# Supplementary material for: Effect of COPD on the Hospital Outcomes and Mortality among Hemorrhagic Stroke Patients. Sex Differences in a Population-Based Study
Source: MDPI journal article supplement (doi:10.3390/jcm10112491), 2021-06-04
Supplement: s1 [file s1]

**Table S1.** International Classification of Disease 10<sup>th</sup> edition (ICD-10) codes for the clinical diagnosis and procedures used in this investigation.

| Clinical diagnosis and procedures                          | ICD-10 codes                                                                                                                                                                                                                                                                                                                                                                                                                                                                                                                                                                                                                                                                                                                                                                                                                                                                                                                                                                                                                                                                                                                                                                                                                                                                                                                                                                                                                                                                                                                                                                                                                                                                                                                                                                                                                                                                                                                                                                                                                                                                                                                                                                            |
|------------------------------------------------------------|-----------------------------------------------------------------------------------------------------------------------------------------------------------------------------------------------------------------------------------------------------------------------------------------------------------------------------------------------------------------------------------------------------------------------------------------------------------------------------------------------------------------------------------------------------------------------------------------------------------------------------------------------------------------------------------------------------------------------------------------------------------------------------------------------------------------------------------------------------------------------------------------------------------------------------------------------------------------------------------------------------------------------------------------------------------------------------------------------------------------------------------------------------------------------------------------------------------------------------------------------------------------------------------------------------------------------------------------------------------------------------------------------------------------------------------------------------------------------------------------------------------------------------------------------------------------------------------------------------------------------------------------------------------------------------------------------------------------------------------------------------------------------------------------------------------------------------------------------------------------------------------------------------------------------------------------------------------------------------------------------------------------------------------------------------------------------------------------------------------------------------------------------------------------------------------------|
| Nontraumatic subarachnoid hemorrhage                       | I60.0, I60.00; I60.01; I60.02; I60.1; I60.10, I60.11, I60.12, I60.2, I60.3; I60.30, I60.31, I60.32, I60.4, I60.5, I60.50, I60.51, I60.52, I60.6, I60.7, I60.8, I60.9                                                                                                                                                                                                                                                                                                                                                                                                                                                                                                                                                                                                                                                                                                                                                                                                                                                                                                                                                                                                                                                                                                                                                                                                                                                                                                                                                                                                                                                                                                                                                                                                                                                                                                                                                                                                                                                                                                                                                                                                                    |
| Nontraumatic intracerebral hemorrhage                      | I61.0, I61.2, I61.3, I61.4, I61.5, I61.6, I61.8, I61.9                                                                                                                                                                                                                                                                                                                                                                                                                                                                                                                                                                                                                                                                                                                                                                                                                                                                                                                                                                                                                                                                                                                                                                                                                                                                                                                                                                                                                                                                                                                                                                                                                                                                                                                                                                                                                                                                                                                                                                                                                                                                                                                                  |
| Other and unspecified nontraumatic intracranial hemorrhage | I62.0, I62.00, I62.01, I62.02, I62.03, I62.1, I62.9                                                                                                                                                                                                                                                                                                                                                                                                                                                                                                                                                                                                                                                                                                                                                                                                                                                                                                                                                                                                                                                                                                                                                                                                                                                                                                                                                                                                                                                                                                                                                                                                                                                                                                                                                                                                                                                                                                                                                                                                                                                                                                                                     |
| Obesity                                                    | E66.X                                                                                                                                                                                                                                                                                                                                                                                                                                                                                                                                                                                                                                                                                                                                                                                                                                                                                                                                                                                                                                                                                                                                                                                                                                                                                                                                                                                                                                                                                                                                                                                                                                                                                                                                                                                                                                                                                                                                                                                                                                                                                                                                                                                   |
| Hypertension                                               | I10, I16.6                                                                                                                                                                                                                                                                                                                                                                                                                                                                                                                                                                                                                                                                                                                                                                                                                                                                                                                                                                                                                                                                                                                                                                                                                                                                                                                                                                                                                                                                                                                                                                                                                                                                                                                                                                                                                                                                                                                                                                                                                                                                                                                                                                              |
| Lipid metabolism disorders                                 | E78.0X-E78.5                                                                                                                                                                                                                                                                                                                                                                                                                                                                                                                                                                                                                                                                                                                                                                                                                                                                                                                                                                                                                                                                                                                                                                                                                                                                                                                                                                                                                                                                                                                                                                                                                                                                                                                                                                                                                                                                                                                                                                                                                                                                                                                                                                            |
| Atrial fibrillation                                        | I48.0, I48.1, I48.2, I48.91                                                                                                                                                                                                                                                                                                                                                                                                                                                                                                                                                                                                                                                                                                                                                                                                                                                                                                                                                                                                                                                                                                                                                                                                                                                                                                                                                                                                                                                                                                                                                                                                                                                                                                                                                                                                                                                                                                                                                                                                                                                                                                                                                             |
| Anemia                                                     | D50.0, D50.8, D50.9, D51.x-D53.x                                                                                                                                                                                                                                                                                                                                                                                                                                                                                                                                                                                                                                                                                                                                                                                                                                                                                                                                                                                                                                                                                                                                                                                                                                                                                                                                                                                                                                                                                                                                                                                                                                                                                                                                                                                                                                                                                                                                                                                                                                                                                                                                                        |
| Alcohol abuse                                              | F10, E52, G62.1, I42.6, K29.2, K70.0, K70.3, K70.9, T51.x, Z50.2, Z71.4, Z72.1                                                                                                                                                                                                                                                                                                                                                                                                                                                                                                                                                                                                                                                                                                                                                                                                                                                                                                                                                                                                                                                                                                                                                                                                                                                                                                                                                                                                                                                                                                                                                                                                                                                                                                                                                                                                                                                                                                                                                                                                                                                                                                          |
| Depression                                                 | F20.4, F31.3-F31.5, F32.x, F33.x, F34.1, F41.2, F43.2                                                                                                                                                                                                                                                                                                                                                                                                                                                                                                                                                                                                                                                                                                                                                                                                                                                                                                                                                                                                                                                                                                                                                                                                                                                                                                                                                                                                                                                                                                                                                                                                                                                                                                                                                                                                                                                                                                                                                                                                                                                                                                                                   |
| Sepsis                                                     | R65.20, R65.21, A40.X, A41.XX                                                                                                                                                                                                                                                                                                                                                                                                                                                                                                                                                                                                                                                                                                                                                                                                                                                                                                                                                                                                                                                                                                                                                                                                                                                                                                                                                                                                                                                                                                                                                                                                                                                                                                                                                                                                                                                                                                                                                                                                                                                                                                                                                           |
| Nosocomial pneumonia                                       | J12-J18, J95.851                                                                                                                                                                                                                                                                                                                                                                                                                                                                                                                                                                                                                                                                                                                                                                                                                                                                                                                                                                                                                                                                                                                                                                                                                                                                                                                                                                                                                                                                                                                                                                                                                                                                                                                                                                                                                                                                                                                                                                                                                                                                                                                                                                        |
| Mechanical ventilation                                     | 5A1945Z, 5A1955Z, 5A1935Z, 5A09357, 5A09457, 5A09557                                                                                                                                                                                                                                                                                                                                                                                                                                                                                                                                                                                                                                                                                                                                                                                                                                                                                                                                                                                                                                                                                                                                                                                                                                                                                                                                                                                                                                                                                                                                                                                                                                                                                                                                                                                                                                                                                                                                                                                                                                                                                                                                    |
| Decompressive craniectomy                                  | 00J00ZZ, 00W00JZ, 00W00KZ, 0N800ZZ, 0N803ZZ, 0N804ZZ, 0NC10ZZ, 0NC13ZZ, 0NC14ZZ, 0NC30ZZ, 0NC33ZZ, 0NC34ZZ, 0NC40ZZ, 0NC43ZZ, 0NC44ZZ, 0NC50ZZ, 0NC53ZZ, 0NC54ZZ, 0NC60ZZ, 0NC63ZZ, 0NC64ZZ, 0NC70ZZ, 0NC73ZZ, 0NC74ZZ, 0NH00MZ, 0NH03MZ, 0NH04MZ, 0NP000Z, 0NP004Z, 0NP005Z, 0NP007Z, 0NP007Z, 0NP00KZ, 0NP00SZ, 0NP030Z, 0NP034Z, 0NP037Z, 0NP03KZ, 0NP03SZ, 0NP040Z, 0NP044Z, 0NP047Z, 0NP04KZ, 0NP04SZ, 0NP0X4Z, 0NP0XSZ, 0NW000Z, 0NW004Z, 0NW005Z, 0NW007Z, 0NW00JZ, 0NW00KZ, 0NW00MZ, 0NW00SZ, 0NW030Z, 0NW034Z, 0NW035Z, 0NW037Z, 0NW03JZ, 0NW03KZ, 0NW03MZ, 0NW03SZ, 0NW040Z, 0NW044Z, 0NW045Z, 0NW047Z, 0NW04JZ, 0NW04KZ, 0NW04MZ, 0NW04SZ, 0W9100Z, 0W010ZZ, 0W9130Z, 0W913ZZ, 0W9140Z, 0W914ZZ, 0WC10ZZ, 0WC13ZZ, 0WC14ZZ, 0WH10YZ, 0WH13YZ, 0WH14YZ, 0WJ10ZZ, 0WP100Z, 0WP101Z, 0WP10JZ, 0WP10YZ, 0WP130Z, 0WP131Z, 0WP13JZ, 0WP13YZ, 0WP140Z, 0WP141Z, 0WP14JZ, 0WP14HZ, 0WW00Z, 0WW101Z, 0WW103Z, 0WW10JZ, 0WW10YZ, 0WW130Z, 0WW131Z, 0WW133Z, 0WW13JZ, 0WW13YZ, 0WW140Z, 0WW141Z, 0WW143Z, 0WW14JZ, 0WW14YZ, 0N500ZZ, 0N503ZZ, 0N504ZZ, 0NB00ZZ, 0NB03ZZ, 0NB04ZZ, 0NT10ZZ, 0NT30ZZ, 0NT40ZZ, 0NT50ZZ, 0NT60ZZ, 0NT70ZZ, 009100Z, 00910ZZ, 00C10ZZ, 00C13ZZ, 00C14ZZ, 009000Z, 00900ZZ, 009030Z, 00903ZZ, 009040Z, 00904ZZ, 00C00ZZ, 00C03ZZ, 00C04ZZ, 00H003Z, 00H003Z, 00H00YZ, 00H032Z, 00H033Z, 00H03YZ, 00H042Z, 00H043Z, 00H04YZ, 00H602Z, 00H603Z, 00H60YZ, 00H632Z, 00H633Z, 00H63YZ, 00H642Z, 00H643Z, 00H64YZ, 00P000Z, 00P002Z, 00P003Z, 00P007Z, 00P00JZ, 00P00KZ, 00P00YZ, 00P030Z, 00P032Z, 00P033Z, 00P037Z, 00P03JZ, 00P03KZ, 00P03YZ, 00P040Z, 00P042Z, 00P043Z, 00P047Z, 00P04JZ, 00P04KZ, 00P04YZ, 00P600Z, 00P602Z, 00P603Z, 00P60YZ, 00P630Z, 00P632Z, 00P633Z, 00P63YZ, 00P640Z, 00P642Z, 00P643Z, 00P64YZ, 00P6X2Z, 00W000Z, 00W002Z, 00W003Z, 00W007Z, 00W00MZ, 00W00YZ, 00W030Z, 00W032Z, 00W033Z, 00W037Z, 00W03JZ, 00W03KZ, 00W03MZ, 00W03YZ, 00W040Z, 00W042Z, 00W043Z, 00W047Z, 00W04JZ, 00W04KZ, 00W04MZ, 00W04YZ, 00W600Z, 00W602Z, 00W603Z, 00W60MZ, 00W60YZ, 00W630Z, 00W632Z, 00W633Z, 00W63MZ, 00W63YZ, 00W640Z, 00W642Z, 00W643Z, 00W64MZ, 00W64YZ, 00B70ZZ, 00B73ZZ, 00B74ZZ, 0500ZZ, 00503ZZ, 00504ZZ, 00B00ZZ, 00B03ZZ, 00B04ZZ. |

**Table S2.** Clinical characteristics, use of therapeutic procedures and hospital outcomes after propensity score matching in men patients with hemorrhagic stroke.

| Variables                                                        | AFTER PSM    |              |         |
|------------------------------------------------------------------|--------------|--------------|---------|
|                                                                  | COPD         | No COPD      | p-value |
| Nontraumatic subarachnoid hemorrhage, n(%)                       | 291(9.69)    | 282(9.39)    | 0.752   |
| Nontraumatic intracerebral hemorrhage, n(%)                      | 1782(59.32)  | 1794(59.72)  | 0.932   |
| Other and unspecified nontraumatic intracranial hemorrhage, n(%) | 931(30.99)   | 928(30.89)   | 0.911   |
| Age, mean (SD)                                                   | 75.47(10.69) | 75.45(10.92) | 0.945   |
| CCI, mean (SD)                                                   | 1.04(0.89)   | 0.99(0.87)   | 0.061   |
| Obesity, n(%)                                                    | 218(7.26)    | 202(6.72)    | 0.418   |
| Hypertension, n(%)                                               | 1700(56.59)  | 1679(55.89)  | 0.585   |
| Lipid metabolism disorders, n(%)                                 | 1105(36.78)  | 1096(36.48)  | 0.810   |
| Diabetes, n(%)                                                   | 880(29.29)   | 881(29.33)   | 0.977   |
| Renal disease, n(%)                                              | 399(13.28)   | 411(13.68)   | 0.650   |
| Atrial fibrillation, n(%)                                        | 813(27.06)   | 821(27.33)   | 0.817   |
| Congestive heart failure, n(%)                                   | 250(8.32)    | 249(8.29)    | 0.963   |
| Peripheral vascular disease, n(%)                                | 229(7.62)    | 225(7.49)    | 0.845   |
| Acute myocardial infarction, n(%)                                | 126(4.19)    | 124(4.13)    | 0.897   |
| Dementia, n(%)                                                   | 155(5.16)    | 164(5.46)    | 0.605   |
| Anemia, n(%)                                                     | 94(3.13)     | 97(3.23)     | 0.825   |
| Alcohol abuse, n(%)                                              | 377(12.55)   | 363(12.08)   | 0.583   |
| Depression, n(%)                                                 | 141(4.69)    | 130(4.33)    | 0.494   |
| Sepsis, n(%)                                                     | 47(1.56)     | 49(1.63)     | 0.837   |
| Nosocomial pneumonia, n(%)                                       | 82(2.73)     | 62(2.06)     | 0.094   |
| Decompressive craniectomy, n(%)                                  | 177(5.89)    | 218(7.26)    | 0.033   |
| LOHS, median (IQR)                                               | 8(12)        | 7(11)        | 0.857   |
| In-hospital mortality, n(%)                                      | 900(29.96)   | 825(27.46)   | 0.032   |

PSM: Propensity Score Matching. COPD: Chronic Obstructive Pulmonary Disease. CCI: Charlson comorbidity index; LOHS: length of hospital stay.

**Table S3.** Clinical characteristics, use of therapeutic procedures and hospital outcomes after propensity score matching in women patients with hemorrhagic stroke.

| Variables                                                        | AFTER PSM    |              |         |
|------------------------------------------------------------------|--------------|--------------|---------|
|                                                                  | COPD         | No COPD      | p-value |
| Nontraumatic subarachnoid hemorrhage, n(%)                       | 305(23.07)   | 306(23.15)   | 0.692   |
| Nontraumatic intracerebral hemorrhage, n(%)                      | 790(59.76)   | 780(59)      | 0.645   |
| Other and unspecified nontraumatic intracranial hemorrhage, n(%) | 227(17.17)   | 236(17.85)   | 0.887   |
| Age, mean (SD)                                                   | 74.12(12.86) | 74.56(12.94) | 0.375   |
| CCI, mean (SD)                                                   | 0.84(0.74)   | 0.79(0.67)   | 0.169   |
| Obesity, n(%)                                                    | 169(12.78)   | 166(12.56)   | 0.861   |
| Hypertension, n(%)                                               | 753(56.96)   | 768(58.09)   | 0.555   |
| Lipid metabolism disorders, n(%)                                 | 489(36.99)   | 502(37.97)   | 0.601   |
| Diabetes, n(%)                                                   | 312(23.6)    | 318(24.05)   | 0.784   |
| Renal disease, n(%)                                              | 139(10.51)   | 141(10.67)   | 0.899   |
| Atrial fibrillation, n(%)                                        | 340(25.72)   | 350(26.48)   | 0.658   |
| Congestive heart failure, n(%)                                   | 125(9.46)    | 124(9.38)    | 0.947   |
| Peripheral vascular disease, n(%)                                | 41(3.1)      | 40(3.03)     | 0.910   |
| Acute myocardial infarction, n(%)                                | 25(1.89)     | 19(1.44)     | 0.362   |
| Dementia, n(%)                                                   | 72(5.45)     | 67(5.07)     | 0.663   |
| Anemia, n(%)                                                     | 55(4.16)     | 54(4.08)     | 0.922   |
| Alcohol abuse, n(%)                                              | 38(2.87)     | 36(2.72)     | 0.814   |
| Depression, n(%)                                                 | 147(11.12)   | 140(10.59)   | 0.662   |
| Sepsis, n(%)                                                     | 12(0.91)     | 8(0.61)      | 0.369   |
| Nosocomial pneumonia, n(%)                                       | 33(2.49)     | 21(1.59)     | 0.271   |
| Decompressive craniectomy, n(%)                                  | 60(4.54)     | 57(4.31)     | 0.777   |
| LOHS, median (IQR)                                               | 9(15)        | 8(12)        | 0.137   |
| In-hospital mortality, n(%)                                      | 404(30.56)   | 422(31.92)   | 0.450   |

PSM: Propensity Score Matching. COPD: Chronic Obstructive Pulmonary Disease. CCI: Charlson comorbidity index; LOHS: length of hospital stay

**Table S4.** Clinical characteristics, use of therapeutic procedures and hospital outcomes after propensity score matching among COPD patients with hemorrhagic stroke according to sex.

| Variables                         | AFTER PSM    |              |         |
|-----------------------------------|--------------|--------------|---------|
|                                   | Men          | Women        | p-value |
| 40-59 years, n(%)                 | 162(12.25)   | 203(15.36)   | 0.021   |
| 60-74 years, n(%)                 | 394(29.8)    | 384(29.05)   | 0.670   |
| ≥75 years, n(%)                   | 766(57.94)   | 735(55.6)    | 0.224   |
| Age, mean (SD)                    | 74.44(11.54) | 74.12(12.86) | 0.500   |
| CCI, mean (SD)                    | 0.86(0.78)   | 0.84(0.74)   | 0.550   |
| Obesity, n(%)                     | 150(11.35)   | 169(12.78)   | 0.257   |
| Hypertension, n(%)                | 760(57.49)   | 753(56.96)   | 0.783   |
| Lipid metabolism disorders, n(%)  | 497(37.59)   | 489(36.99)   | 0.748   |
| Diabetes, n(%)                    | 327(24.74)   | 312(23.6)    | 0.496   |
| Renal disease, n(%)               | 142(10.74)   | 139(10.51)   | 0.850   |
| Atrial fibrillation, n(%)         | 375(28.37)   | 340(25.72)   | 0.125   |
| Congestive heart failure, n(%)    | 109(8.25)    | 125(9.46)    | 0.273   |
| Peripheral vascular disease, n(%) | 35(2.65)     | 41(3.1)      | 0.485   |
| Acute myocardial infarction, n(%) | 23(1.74)     | 25(1.89)     | 0.771   |
| Dementia, n(%)                    | 77(5.82)     | 72(5.45)     | 0.673   |
| Anemia, n(%)                      | 52(3.93)     | 55(4.16)     | 0.767   |
| Alcohol abuse, n(%)               | 42(3.18)     | 38(2.87)     | 0.650   |
| Depression, n(%)                  | 113(8.55)    | 147(11.12)   | 0.026   |
| Sepsis, n(%)                      | 10(0.76)     | 12(0.91)     | 0.669   |
| Nosocomial pneumonia, n(%)        | 43(3.26)     | 33(2.49)     | 0.018   |
| Decompressive craniectomy, n(%)   | 89(6.74)     | 60(4.54)     | 0.014   |
| LOHS, median (IQR)                | 8(13)        | 9(15)        | 0.154   |
| In-hospital mortality, n(%)       | 404(30.56)   | 404(30.56)   | 0.999   |

PSM: Propensity Score Matching. COPD: Chronic Obstructive Pulmonary Disease. CCI: Charlson comorbidity index; LOHS: length of hospital stay.

**Table S5.** Logistic regression factors associated with IHM after hemorrhagic stroke among all patients and according to the presence of COPD to assess the sex differences.

|                             | Male            | Female          |
|-----------------------------|-----------------|-----------------|
| Variables                   | OR (95%CI)      | OR (95%CI)      |
| 40-59 years                 | 1               | 1               |
| 60-74 years                 | 1(0.8-1.27)     | 1.49(1.11-1.99) |
| ≥75 years                   | 1.52(1.22-1.89) | 2.1(1.61-2.74)  |
| Renal disease               | 1.28(1.09-1.5)  |                 |
| Atrial fibrillation         | 1.45(1.28-1.65) | -               |
| Congestive heart failure    | 1.41(1.16-1.72) | 1.38(1.13-2.07) |
| Dementia                    | -               | 1.58(1.1-2.27)  |
| Peripheral vascular disease | 1.23(1-1.52)    | -               |
| Sepsis                      | 3.75(2.45-5.72) | -               |
| Decompressive craniectomy   | 0.36(0.27-0.49) | 0.58(0.36-0.93) |
| COPD                        | 1.12(1.01-1.26) | -               |

COPD: Chronic Obstructive Pulmonary Disease. NA: Not available Only variables with significant results in the multivariable regression are shown in the table.
